# Supplementary material for: Fontan‐Associated Liver Disease: Spectrum of Disease in Children and Adolescents
Source: PubMed Central journal article supplement — J Am Heart Assoc. 2020 Jan 4;9(1):e012529. doi: 10.1161/JAHA.119.012529 (PMC6988152; doi:10.1161/jaha.119.012529), 2020-01-04
Supplement: JAH3-9-e012529-s001.pdf [file JAH3-9-e012529-s001.pdf]

# **SUPPLEMENTAL MATERIAL**

**Table S1. BC Children’s Hospital liver health surveillance pathway for Fontan patients.**

|                                                                                                                       |
|-----------------------------------------------------------------------------------------------------------------------|
| <b>Annual Investigations</b>                                                                                          |
| Physical examination                                                                                                  |
| Laboratory studies:<br>ALT, AST, GGT, Alkaline phosphatase, bilirubin, albumin, CBC,<br>INR, Hepatitis serology, APRI |
| Abdominal ultrasound                                                                                                  |
| Transient elastography (Fibroscan®)                                                                                   |
| <b>10 years post-Fontan [Earlier if clinically indicated]</b>                                                         |
| Cardiac catheterization                                                                                               |
| Transjugular liver biopsy                                                                                             |

**Table S2. System used to stage liver fibrosis and grade portal inflammation in all transjugular liver biopsy specimens.**

| Parameter                                  | Score | Degree of severity | Description                                                   |
|--------------------------------------------|-------|--------------------|---------------------------------------------------------------|
| <b>Scheuer portal fibrosis score (0-4)</b> | 0     | Mild               | No Fibrosis                                                   |
|                                            | 1     |                    | Enlarged, fibrotic portal tracts                              |
|                                            | 2     | Moderate           | Periportal or portal-portal septa but intact architecture     |
|                                            | 3     | Severe             | Fibrosis with distorted architecture but no obvious cirrhosis |
|                                            | 4     |                    | Cirrhosis, probable or definite                               |
| <b>Sinusoidal fibrosis score (0-4)</b>     | 0     | Mild               | No fibrosis                                                   |
|                                            | 1     |                    | Fibrosis present in <1/3 of sinusoids                         |
|                                            | 2     | Moderate           | Fibrosis present in 1/3-2/3 of sinusoids                      |
|                                            | 3     | Severe             | Fibrosis present in >2/3 of sinusoids                         |
|                                            | 4     |                    | Cardiac cirrhosis                                             |
| <b>Portal inflammation (0-3)</b>           | 0     | Mild               | No inflammation                                               |
|                                            | 1     |                    | Mild inflammation in some or all portal tracts                |
|                                            | 2     | Moderate           | Moderate inflammation in some or all portal tracts            |
|                                            | 3     | Severe             | Marked inflammation in some or all portal tracts              |
| <b>Sinusoidal dilation (0-3)</b>           | 0     | Mild               | No dilatation                                                 |
|                                            | 1     |                    | Dilatation present in <1/3 of sinusoids                       |
|                                            | 2     | Moderate           | Dilatation in 1/3-2/3 of sinusoids                            |
|                                            | 3     | Severe             | Dilatation present in >2/3 of sinusoids                       |

**Table S3. Association between the median liver stiffness and the type of systemic ventricle.**

|                              | <b>Type of systemic ventricle</b> |                  |                     |     |
|------------------------------|-----------------------------------|------------------|---------------------|-----|
|                              | Right (n=35)                      | Left (n=33)      | Indeterminate (n=8) | p   |
| Median (IQR) liver stiffness | 17.1 (14.5-21.3)                  | 15.0 (13.3-20.0) | 16.4 (11.7-21.4)    | 0.3 |

Statistical analysis performed using the Kruskal-Wallis test.

**Table S4. Histological scores and demographics for each patient who underwent liver biopsy. (\*Not enough portal tracts sampled. May not be representative).**

| <b>Patient number</b>                      | <b>1</b> | <b>2</b> | <b>3</b> | <b>4</b> | <b>5</b> | <b>6</b> | <b>7</b> | <b>8</b> | <b>9</b> | <b>10</b> | <b>11</b> | <b>12</b> | <b>13</b> | <b>14</b> | <b>15</b> | <b>16</b> | <b>17*</b> |
|--------------------------------------------|----------|----------|----------|----------|----------|----------|----------|----------|----------|-----------|-----------|-----------|-----------|-----------|-----------|-----------|------------|
| <b>Scheuer portal fibrosis score (0-4)</b> | 2        | 0        | 1        | 1        | 1        | 1        | 1        | 2        | 2        | 1         | 0         | 0         | 1         | 0         | 1         | 2         | 1          |
| <b>Sinusoidal fibrosis score (0-4)</b>     | 1        | 1        | 1        | 1        | 1        | 1        | 1        | 1        | 2        | 1         | 1         | 1         | 1         | 1         | 1         | 1         | 1          |
| <b>Portal inflammation (0-3)</b>           | 1        | 0        | 1        | 2        | 1        | 1        | 1        | 1        | 0        | 1         | 1         | 0         | 1         | 1         | 1         | 1         | 0          |
| <b>Sinusoidal dilatation (0-3)</b>         | 1        | 2        | 1        | 1        | 1        | 1        | 2        | 2        | 1        | 2         | 2         | 1         | 1         | 2         | 2         | 1         | 0          |
| <b>Congestive hepatic fibrosis (0-3)</b>   | 0        | 1        | 0        | 2A       | 0        | 2A       | 2A       | 2A       | 2B       | 2B        | 1         | 0         | 2A        | 0         | 2B        | 2B        | 2A         |
| <b>Physiologic ventricle</b>               | L        | R        | L        | R        | L        | R        | R        | R/L      | R        | R         | L         | R         | L         | L         | L         | R         | L          |
| <b>Liver stiffness (kPa)</b>               | 48.6     | 37.4     | 35.3     | 26.4     | 21.3     | 21.3     | 21       | 19.8     | 17.6     | 17.5      | 17.3      | 17.3      | 17.1      | N/A       | 14.5      | N/A       | N/A        |
| <b>Time from Fontan</b>                    | 10       | 10       | 8        | 11       | 13       | 10       | 12       | 13       | 11       | 11        | 12        | 11        | 8         | 12        | 13        | 17        | 11         |
| <b>Age at biopsy (yr)</b>                  | 14       | 13       | 14       | 18       | 14       | 17       | 13       | 16       | 17       | 15        | 14        | 14        | 11        | 16        | 18        | 22        | 14         |

**Table S5. Association between the median liver stiffness and the severity of liver pathology.**

| <b>Degree of severity</b>      | <b>N</b> | <b>Median (IQR) liver stiffness (kPa)</b> | <b>p</b> |
|--------------------------------|----------|-------------------------------------------|----------|
| <b>Scheuer portal fibrosis</b> |          |                                           |          |
| Mild (0-1)                     | 9        | 21.3 (17.5-26.4)                          | 0.5      |
| Moderate (2)                   | 2        | 33.1 (17.6-48.6)                          |          |
| Severe (3-4)                   | 0        | -                                         |          |
| <b>Sinusoidal dilation</b>     |          |                                           |          |
| Mild (0-1)                     | 8        | 21.3 (17.4-30.8)                          | 1.0      |
| Moderate (2)                   | 3        | 21.0 (17.5-37.4)                          |          |
| Severe (3-4)                   | 0        | -                                         |          |
| <b>Sinusoidal fibrosis</b>     |          |                                           |          |
| Mild (0-1)                     | 10       | 21.3 (17.5-35.3)                          | 0.5      |
| Moderate (2)                   | 1        | 17.6 (17.6-17.6)                          |          |
| Severe (3-4)                   | 0        | -                                         |          |
| <b>Portal inflammation</b>     |          |                                           |          |
| Mild (0-1)                     | 10       | 21.1 (17.5-35.3)                          | 0.5      |
| Moderate (2)                   | 1        | 26.4 (26.4-26.4)                          |          |
| Severe (3-4)                   | 0        | -                                         |          |

Statistical analysis performed using the Wilcoxon rank-sum test.

**Table S6. Association between the median APRI and the degree of severity of liver pathology.**

| <b>Degree of severity</b>      | <b>N</b> | <b>Median (IQR) APRI</b> | <b>p</b> |
|--------------------------------|----------|--------------------------|----------|
| <b>Scheuer portal fibrosis</b> |          |                          |          |
| Mild (0-1)                     | 9        | 0.5 (0.4-0.5)            | 0.5      |
| Moderate (2)                   | 4        | 0.6 (0.3-1.0)            |          |
| Severe (3-4)                   | 0        | -                        |          |
| <b>Sinusoidal dilation</b>     |          |                          |          |
| Mild (0-1)                     | 7        | 0.5 (0.5-0.7)            | 0.5      |
| Moderate (2)                   | 6        | 0.4 (0.3-0.5)            |          |
| Severe (3-4)                   | 0        | -                        |          |
| <b>Sinusoidal fibrosis</b>     |          |                          |          |
| Mild (0-1)                     | 12       | 0.5 (0.4-0.6)            | 0.3      |
| Moderate (2)                   | 1        | 0.7 (0.7-0.7)            |          |
| Severe (3-4)                   | 0        | -                        |          |
| <b>Portal inflammation</b>     |          |                          |          |
| Mild (0-1)                     | 12       | 0.5 (0.4-0.7)            | 0.7      |
| Moderate (2)                   | 1        | 0.5 (0.5-0.5)            |          |
| Severe (3-4)                   | 0        | -                        |          |

Statistical analysis performed using the Wilcoxon rank-sum test.

**Table S7. Association between the median PVR and the severity of liver pathology.**

| <b>Degree of severity</b>      | <b>N</b> | <b>Median (IQR) PVR<br/>(mmHg.min/L)</b> | <b>p</b> |
|--------------------------------|----------|------------------------------------------|----------|
| <b>Scheuer portal fibrosis</b> |          |                                          |          |
| Mild (0-1)                     | 13       | 1.6 (0.9-1.9)                            | 0.5      |
| Moderate (2)                   | 4        | 1.3 (1.0-1.6)                            |          |
| Severe (3-4)                   | 0        | -                                        |          |
| <b>Sinusoidal dilation</b>     |          |                                          |          |
| Mild (0-1)                     | 10       | 1.4 (0.9-1.8)                            | 0.8      |
| Moderate (2)                   | 7        | 1.6 (1.0-1.9)                            |          |
| Severe (3-4)                   | 0        | -                                        |          |
| <b>Sinusoidal fibrosis</b>     |          |                                          |          |
| Mild (0-1)                     | 16       | 1.5 (0.9-1.8)                            | 0.9      |
| Moderate (2)                   | 1        | 1.4 (1.4-1.4)                            |          |
| Severe (3-4)                   | 0        | -                                        |          |
| <b>Portal inflammation</b>     |          |                                          |          |
| Mild (0-1)                     | 16       | 1.5 (0.9-1.8)                            | 0.4      |
| Moderate (2)                   | 1        | 0.9 (0.9-0.9)                            |          |
| Severe (3-4)                   | 0        | -                                        |          |

Statistical analysis performed using the Wilcoxon rank-sum test.
